# Supplementary material
Source: Elsevier journal article supplement (https://www.sciencedirect.com/science/article/pii/S2605153220301539)
Supplement: mmc1 [file S2605153220301539:mmc1.pdf]

## SUPPLEMENTARY DATA

**Table 1 of the supplementary data - Comparative of HRQoL analysis of the patients with FCM infusion at three months follow-up.**

| Test/Questionnaire                                                           | Basal<br>(n = 205) | 3 months<br>(n = 52) | P    |
|------------------------------------------------------------------------------|--------------------|----------------------|------|
| EQ-5D-3L-mobility, n (%)                                                     |                    |                      |      |
| I have no problems walking about                                             | 78 (37.7)          | 22 (42.3)            | .842 |
| I have some problems walking about                                           | 128 (61.8)         | 30 (57.7)            | .842 |
| I am confined to bed                                                         | 1 (0.5)            | 0 (0)                | -    |
| EQ-5D-3L-self-care, n (%)                                                    |                    |                      |      |
| I have no problems with self-care                                            | 150 (72.1)         | 40 (76.9)            | .274 |
| I have some problems washing or dressing myself                              | 50 (24.0)          | 12 (23.1)            | .651 |
| I am unable to wash or dress myself                                          | 8 (3.8)            | 0 (0)                | .079 |
| EQ-5D-3L-activities, n (%)                                                   |                    |                      |      |
| I have no problems with performing my usual activities                       | 99 (47.8)          | 23 (44.2)            | .843 |
| I have some problems with performing my usual activities                     | 94 (45.4)          | 28 (53.8)            | .844 |
| I am unable to perform my usual activities                                   | 14 (6.8)           | 1 (1.9)              | .308 |
| EQ-5D-3L-pain, n (%)                                                         |                    |                      |      |
| I have no pain or discomfort                                                 | 85 (40.9)          | 19 (36.5)            | .839 |
| I have moderate pain or discomfort                                           | 103 (49.5)         | 28 (53.8)            | .990 |
| I have extreme pain or discomfort                                            | 20 (9.6)           | 5 (9.6)              | .727 |
| EQ-5D-3L-anxiety, n (%)                                                      |                    |                      |      |
| I am not anxious or depressed                                                | 113 (54.6)         | 34 (65.4)            | .420 |
| I am moderately anxious or depressed                                         | 86 (41.5)          | 16 (30.8)            | .410 |
| I am extremely anxious or depressed                                          | 8 (3.9)            | 2 (3.8)              | .990 |
| Minnesota Questionnaire                                                      |                    |                      |      |
| Q1. Causing swelling in your ankles or legs?                                 | 1.53 ±1.62         | 1.33 ± 1.39          | .569 |
| Q2. Making you sit or lie down to rest during the day?                       | 1.96 ±1.67         | 1.88 ± 1.49          | .646 |
| Q3. Making your walking about or climbing stairs difficult?                  | 2.93 ±1.69         | 2.47 ± 1.78          | .179 |
| Q4. Making your working around the house or yard difficult?                  | 2.41 ±1.82         | 2.06 ± 1.87          | .467 |
| Q5. Making your going places away from home difficult?                       | 2.60 ± 1.83        | 2.35 ± 2.02          | .258 |
| Q6. Making your sleeping well at night difficult?                            | 1.98 ±1.68         | 1.42 ± 1.75          | .113 |
| Q7. Making you relating to or doing things with friends or family difficult? | 1.32 ±1.56         | 1.21 ± 1.56          | .999 |
| Q8. Making you working to earn a living difficult?                           | 1.58 ±1.97         | 1.23 ± 1.69          | .544 |
| Q9. Making your recreational pastimes, sports, or hobbies difficult?         | 1.96 ±1.95         | 1.47 ± 1.68          | .550 |
| Q10. Making your sexual activities difficult?                                | 1.68 ±1.92         | 1.69 ± 1.92          | .327 |

|                                                                     |                |             |      |
|---------------------------------------------------------------------|----------------|-------------|------|
| Q11. Making you eat less of the foods you like?                     | 2.03 ±1.76     | 1.79 ±1.89  | .634 |
| Q12. Making you short of breath?                                    | 2.19 ±1.75     | 1.74 ±1.73  | .885 |
| Q13. Making you tired, fatigued, or low on energy?                  | 2.51 ±1.74     | 1.69 ±1.94  | .165 |
| Q14. Making your stay in a hospital?                                | 1.30 ±1.67     | 0.92 ±1.53  | .177 |
| Q15. Costing you money for medical care?                            | 1.32 ±1.67     | 0.96 ±1.43  | .061 |
| Q16. Giving you side effects from treatments?                       | 1.00 ±1.45     | 0.96 ±1.48  | .339 |
| Q17. Making you feel you are a burden to your family or friends?    | 1.25 ±1.66     | 1.29 ±1.66  | .659 |
| Q18. Making you feel a loss of self-control in your life?           | 1.48 ±<br>1.76 | 1.45 ±1.74  | .924 |
| Q19. Making you worry?                                              | 2.01 ±1.80     | 1.62 ± 1.80 | .172 |
| Q20. Making it difficult for you to concentrate or remember things? | 1.78 ±1.71     | 1.45 ±1.61  | .334 |
| Q21. Making you feel depressed?                                     | 1.66 ±1.70     | 1.27 ±1.48  | .103 |
|                                                                     |                |             |      |
| MLHFQ Questionnaire                                                 |                |             |      |
| Physical dimension                                                  | 18.4 ±10.8     | 15.9 ±10.5  | .326 |
| Emotional dimension                                                 | 8.1 ±7.3       | 7.1 ±7.0    | .318 |
| Global score                                                        | 38.4 ±<br>26.0 | 34.9 ±25.2  | .334 |

FCM, ferric carboxymaltose; HRQoL, health-related quality of life; MLHFQ,

Minnesota Living with Heart Failure Questionnaire; Q, question number.

There were 31 patients with incomplete basal EQ-5D-3L and Minnesota test and 147 in the 3 months follow-up.

Data are expressed as no. (%) or mean ± standard deviation.

**Table 2 of the supplementary data - Comparative of the characteristics of the patients at three months according to TSAT level.**

| Characteristics         | TSAT < 20<br>(n = 184) |                 |       | TSAT ≥ 20<br>(n = 34) |                 |       | P     |
|-------------------------|------------------------|-----------------|-------|-----------------------|-----------------|-------|-------|
|                         | Basal                  | 3 months        | P     | Basal                 | 3 months        | P     |       |
| Age (years)             | 73.2 (10.6)            |                 |       | 75.4 (11.6)           |                 |       | .265  |
| Sex (female), n (%)     | 96 (52.2)              |                 |       | 18 (52.9)             |                 |       | .934  |
| SBP (mmHg)              | 124.4 (18.9)           |                 |       | 126.4 (17.0)          |                 |       | .561  |
| HR (bpm)                | 69.5 (11.9)            |                 |       | 67.1 (11.8)           |                 |       | .279  |
| Functional class, n (%) |                        |                 |       |                       |                 |       | .101  |
| NYHA I                  | 4 (2.2)                | 10 (10.0)       | .045  | 3 (9.1)               | 20 (16.3)       | .001  |       |
| NYHA II                 | 141 (79.2)             | 76 (76.0)       |       | 26 (78.8)             | 95 (77.2)       |       |       |
| NYHA III                | 33 (18.5)              | 14 (14.0)       |       | 4 (14.6)              | 8 (6.5)         |       |       |
| NYHA improvement ≥1     |                        | 40 (22.5)       |       |                       | 5 (15.2)        |       | .641  |
| NYHA no improvement     |                        | 133 (74.7)      |       |                       | 27 (81.8)       |       |       |
| NYHA deterioration ≥ 1  |                        | 5 (2.8)         |       |                       | 1 (3.0)         |       |       |
| LVEF (%)                | 44.4 (15.0)            |                 |       | 43.7 (15.7)           |                 |       | .805  |
| FCM dose (mg)           | 951.1 (148.9)          |                 |       | 911.8 (193.5)         |                 |       | .180  |
| Theoretical dose, n (%) | 82 (44.6)              |                 |       | 18 (54.5)             |                 |       | .290  |
| Hb (g/dL)               | 12.3 (1.5)             | 12.9 (1.7)      | .0001 | 13.1 (1.4)            | 13.5 (1.1)      | .018  | .013  |
| Anemia- n (%)           | 84 (45.7)              |                 |       | 10 (30.3)             |                 |       | .101  |
| MCHC (pg)               | 28.9 (2.8)             | 30.3 (2.0)      | .0001 | 30.8 (1.8)            | 31.7 (1.8)      | .012  | .0001 |
| MCV (fL)                | 90.1 (7.9)             | 94.2 (5.4)      | .0001 | 93.2 (12.5)           | 98.7 (5.3)      | .002  | .064  |
| Serum Fe (mcg/dL)       | 47.1 (16.2)            | 79.9 (31.8)     | .0001 | 89.8 (21.1)           | 90.8 (23.9)     | .845  | .0001 |
| Transferrin (mg/dL)     | 284.5 (60.8)           | 232.3 (50.1)    | .0001 | 248.9 (41.5)          | 210.6 (40.0)    | .0001 | .001  |
| Ferritin (ng/mL)        | 64.9 (79.3)            | 280.1 (393.2)   | .0001 | 108.5 (122.3)         | 278.8 (124.7)   | .0001 | .008  |
| TSAT (%)                | 11.9 (4.1)             | 24.0 (11.1)     | .0001 | 25.8 (6.4)            | 29.4 (9.6)      | .021  | .0001 |
| Absolute ID, n (%)      | 151 (82.1)             | 27 (19.4)       | .0001 | 23 (67.6)             | 1 (4.2)         | .0001 | .001  |
| NT-proBNP (pg/mL)       | 4754.0 (6577.4)        | 3282.4 (3611.8) | .001  | 3585.4 (4796.3)       | 2452.2 (2793.7) | .122  | .285  |
| Creatinine (mg/dL)      | 1.3 (0.5)              | 1.3 (0.4)       | .334  | 1.3 (0.6)             | 1.3 (0.6)       | .955  | .881  |
| eGFR (mL/min)           | 58.5 (23.2)            | 56.8 (20.9)     | .549  | 54.4 (21.9)           | 59.7 (24.7)     | .746  | .367  |

BMI, body mass index; BPM, beats per minute; DBP, diastolic blood pressure; eGFR, estimated glomerular filtrated rate; FCM, ferric carboxymaltose; Fe, Iron; Hb, hemoglobin; HR, heart rate; ID, iron deficiency; LVEF, left ventricular ejection fraction; MCHC, mean corpuscular hemoglobin concentration; MCV, mean corpuscular volume; NT-proBNP, N-terminal pro-B-type natriuretic peptide; SBP, systolic blood pressure; TSAT, transferrin saturation.

18 patients were excluded from the analysis for incomplete data.

The correct dose was defined according to weight and Hb<sup>3</sup>. Functional ID was defined as ferritin < 100<sup>3</sup>.
